# Supplementary material for: Sources of Signal in 62 Protein-Coding Nuclear Genes for Higher-Level Phylogenetics of Arthropods
Source: PLoS One. 2011 Aug 4;6(8):e23408. doi: 10.1371/journal.pone.0023408 (PMC3150433; doi:10.1371/journal.pone.0023408)
Supplement: Table S1 — Single-gene bootstrap values (≥75% only, nt123_degen1) for taxonomic groups (nodes) present in Figure 1. This table lists bootstrap values for taxa identified in Figure 1 based on analysis of single genes. (XLS) [file pone.0023408.s001.xls]

## Sheet: Sheet1
taxonomic group	265 fin	226 fin	192 fin	197 fin	3059 fin	aspec 11_12	247 fin	3089 fin	62 fin	42 fin	3007 fin	8028 fin	40 fin	3017 fin	270 fin	268 fin	3031 fin 2_3	149 fin	267 fin	3114 fin	3121 fin	262 fin	3070 fin	109 fin	69 fin	8053 fin	acc	taxonomic group	113 fin	3006 fiin	8091 fin	aspec 2_6	2 fin 3_4	73 fin	8018 fin	127 fin	3202 fin	8029 fin	3012 fin	3094 fin	ef2	274 fin	polii	8070 fin	3066 fin	44 fin	ef1a	58 fin 3_6	96 fin
Onychophora		99	96	97	99				100	100		82	94	100		91			82		83	98		99	100	100	100	Onychophora	100	95			97	95			88		93		99		100		95		98
Peripatopsidae	99																		85	100	98				97	98	81	Peripatopsidae					89				100	99					87				90
Tardigrada		90			100	100		100	100				92								81		99	100	100			Tardigrada	100							99	100				100		100				100	100
Arthropoda																												Arthropoda															98				92	78
Pycnogonida		100		100	98	98			94	98		80				92	92	100						94			100	Pycnogonida	100	78				97		95	92	99	77		99		100		89		98	100
Ammotheidae + Endeididae			92				82							92	76					96	96			86				Ammotheidae + Endeididae													96
Ammotheidae	97			80									92															Ammotheidae			100
Tanystylum + Achelia	85					76																		87				Tanystylum + Achelia													92
Chelicerata																												Chelicerata															91
Euchelicerata																									77			Euchelicerata													95		95		92		98
Xiphosura		100		99		100				100			95	96	98	99		100	100			100	98	100	100	95		Xiphosura	100		99	98		99	98	92	100		93		100		100	100	100		100
Arachnida																												Arachnida
Pulmonata																												Pulmonata
Scorpiones	98	97	94	100	78		98			100		94	100	96	81		98	100				100	84	98	99		91	Scorpiones	97	86	100	98		97		97			99		99		100	95	100	96	93	87
Tetrapulmonata																												Tetrapulmonata
Pedipalpi																												Pedipalpi
Uropygi													97											81				Uropygi															91					95
Mandibulata																												Mandibulata
Myriapoda																												Myriapoda													83
Chilopoda				78							80						88											Chilopoda																		80
Pleurostigmophora																			81	94								Pleurostigmophora
Scolopendromorpha + Lithobiomorpha																												Scolopendromorpha + Lithobiomorpha	98														96
Progoneata																												Progoneata
Diplopoda																												Diplopoda
Chilognatha		86						75						75		90	95			76								Chilognatha			87		81								77							91
Callipodida + Polyzoniida																												Callipodida + Polyzoniida													86
Symphyla + Pauropoda																												Symphyla + Pauropoda
Symphyla			78				80			80						89	95	100	98							100		Symphyla	99				97				93				100		100			84		99
Pancrustacea																		93										Pancrustacea	99														100
Oligostraca																												Oligostraca
Ostracoda																												Ostracoda
Myodocopa								93				95																Myodocopa											92	80	97		100				100	95
Ichthyostraca + Mystacocarida																												Ichthyostraca + Mystacocarida
Ichthyostraca																												Ichthyostraca													85		87		86			87
Altocrustacea																												Altocrustacea
Vericrustacea																												Vericrustacea
Branchiopoda																	82											Branchiopoda															89				78
Anostraca		100	99		100	92		99		99			83	100			100	100	93		100	100	98	89	100	100	99	Anostraca					99	100	95	99		99	99	86	100		100			100	89
Phyllopoda		100											85										84					Phyllopoda
Diplostraca										87							93											Diplostraca																	82
Cladocera + Spinicaudata					98					97			95				96	93			85							Cladocera + Spinicaudata	86														88
Multicrustacea																												Multicrustacea
Copepoda					100	79				100						94		98										Copepoda	100		84		90	76			99			79	100		100		97		93	83
Cyclopoida					100		99	99	97		100					100		100	100		98	100			100		100	Cyclopoida	100		100		96	99				100	100		100	100	100	99			95		88
Communostraca																												Communostraca																			85
Malacostraca	80		96	90	87	100			89				85				88	100	95		97	98					99	Malacostraca	84	76			99				100		76		100		100	98	100		100	100
Eumalacostraca			81	82						97					93			96						98				Eumalacostraca					78							95							92
Eucarida + Peracarida				80						96								76										Eucarida + Peracarida																	88		76
Thecostraca										100	97		86				100	100	100			100	99	96		81		Thecostraca	100				84				94		99	82	100		100	97			100	100
Thoracica	75	87		99	100	100	100	99									92	84							80		100	Thoracica	98			99		100			77				83	95					97
Sessilia			99		76	90						96					84		88									Sessilia														95				93	97
Miracrustacea																												Miracrustacea
Xenocarida																												Xenocarida
Hexapoda																												Hexapoda
Entognatha																												Entognatha
Diplura																										87		Diplura	86												94
Collembola		93		100	100	100	81		98	97	79						98	100					85	100	93			Collembola	100			99					100				92							85
Entomobryomorpha					84		85	79										95				100		89				Entomobryomorpha							100			96
Insecta																		94										Insecta
Archaeognatha	99	100		98					85	100	99		100	100	79	100		100	99			100		85				Archaeognatha	100	98	97			88		96	97	81	100		99		100	79			94	97
Dicondylia																		84										Dicondylia
Zygentoma																			77									Zygentoma											77								95
Pterygota																												Pterygota
Paleoptera											81																	Paleoptera
Ephemeroptera		92					99		85	100			99	99		100			100	88	89			98	98	100		Ephemeroptera						95		100	87	99			98		100		91		95	91
Odonata		100		88	88		75	78	76	100			92		99	89		100		94		92	97		97	100		Odonata		91	98			99	88		100	82					99	98	99	89	98	91
Neoptera																												Neoptera
Polyneoptera					76																			75				Polyneoptera					92										77		96
Blattodea + Orthoptera							89						83															Blattodea + Orthoptera
Lepidoptera	77			99	100	100		99	100	100	83	76	96	100		99	100		99		100	100		100	99	100	99	Lepidoptera	100		96		81		98	100	95	100				100		98	100		99	100
Ditrysia		100	91		76		98				100		93	89		94			94				96	99		76		Ditrysia	70						97				99			99				98
number of above groups recovered = R	8	14	9	14	17	11	11	9	9	17	8	6	17	10	6	12	15	20	15	6	10	11	9	18	13	11	9	numbe of above groups recovered = R	19	6	9	4	12	11	6	8	15	9	12	5	24	5	26	8	14	7	25	17	1
sequence length in nt = L	441	549	402	435	738	594	390	306	765	834	606	324	744	594	423	759	579	927	600	378	435	453	705	537	624	459	471	sequence length in nt = L	975	222	666	297	531	852	303	468	504	387	525	390	2178	537	2025	531	744	528	1092	927	459
R / (L X 10-3)	18	26	22	32	23	19	28	29	12	20	13	19	23	17	14	16	26	22	25	16	23	24	13	34	21	24	19	R / (L X 10-3)	19	27	14	13	23	13	20	17	30	23	23	13	11	9	13	15	19	13	23	18	2
# taxa sequenced (out of 80 total) = T	65	72	64	62	68	52	58	75	63	72	61	52	74	70	57	54	59	66	74	56	60	71	58	66	72	67	59	# taxa sequenced (out of 80 total) = T	69	67	49	41	79	67	54	61	67	69	65	67	75	48	75	59	56	66	80	69	71
(R / (L X 10-3)) X (80 / T) *	22	28	28	42	27	28	39	31	15	23	17	28	25	19	20	23	35	26	27	23	31	27	18	41	23	29	26	(R / (L X 10-3)) X (80 / T)	23	32	22	26	23	15	29	22	36	27	28	15	12	16	14	20	27	16	23	21	2
[truncated: 23 more columns]
