# Supplementary material for: Sources of Signal in 62 Protein-Coding Nuclear Genes for Higher-Level Phylogenetics of Arthropods
Source: PLoS One. 2011 Aug 4;6(8):e23408. doi: 10.1371/journal.pone.0023408 (PMC3150433; doi:10.1371/journal.pone.0023408)
Supplement: Table S2 — Single-gene bootstrap values (≥75% only, nt123_degen1) for taxonomic groups NOT present in Figure 1. This table lists bootstrap values for taxa not recovered in the analysis shown in Figure 1 based on analysis of single genes. (XLS) [file pone.0023408.s002.xls]

## Sheet: Sheet1
taxonomic group	265 fin	226 fin	192 fin	197 fin	3059 fin	aspec 11_12	247 fin	3089 fin	62 fin	42 fin	3007 fin	8028 fin	40 fin	3017 fin	270 fin	268 fin	3031 fin 2_3	149 fin	267 fin	3114 fin	3121 fin	262 fin	3070 fin	109 fin	69 fin	8053 fin	acc	taxonomic group	113 fin	3006 fiin	8091 fin	aspec 2_6	2 fin 3_4	73 fin	8018 fin	127 fin	3202 fin	8029 fin	3012 fin	3094 fin	ef2	274 fin	polii	8070 fin	3066 fin	44 fin	ef1a	58 fin 3_6	96 fin
Tomoceridae + Poduridae (subgroup of Collembola)																	95											Tomoceridae + Poduridae (subgroup of Collembola)**
Entomobryidae + Poduridae (subgroup of Collembola)																												Entomobryidae + Poduridae (subgroup of Collembola)**								82
Paleoptera + Dermaptera (subgroup of Polyneoptera)																		86										Paleoptera + Dermaptera (subgroup of Polyneoptera)**
Orthoptera + Dermaptera (subgroup of Polyneoptera)																							75					Orthoptera + Dermaptera (subgroup of Polyneoptera)**																	92
Eucarida + Hoplocarida (subgroup of Eumalacostraca)																					97							Eucarida + Hoplocarida (subgroup of Eumalacostraca)**					86
Lithobiomorpha + Craterostigmomorpha (subgroup of Pleurostigmomorpha)						84														84								Lithobiomorpha + Craterostigmomorpha (subgroup of Pleurostigmomorpha)**											84
Lepidoptera + Remipedia (subgroup of Miracrustacea)								82																				Lepidoptera + Remipedia (subgroup of Miracrustacea)**
Malacostraca minus Peracarida																					92							Malacostraca minus Peracarida**
Rhizocephala + Sessilia (subgroup of Thecostraca)										75																		Rhizocephala + Sessilia (subgroup of Thecostraca)**
Rhizocephala + Sessilia (part ) (subgroup of Thecostraca)										93																		Rhizocephala + Sessilia (part ) (subgroup of Thecostraca)**
Pedunculata + Sessilia (part) (subgroup of Thecostraca: Thoracica)																												Pedunculata + Sessilia (part) (subgroup of Thecostraca: Thoracica)**													90
Calanoida + Cyclopoida (part) (subgroup of Copepoda)																												Calanoida + Cyclopoida (part) (subgroup of Copepoda)**
Anostraca + Laevicaudata (subgroup of Branchiopoda)																												Anostraca + Laevicaudata (subgroup of Branchiopoda)**						84
Spirobolida + Polyzoniida																												Spirobolida + Polyzoniida**								86
Callipodida + Spirobolida																		79										Callipodida + Spirobolida**
Lithobiomorpha + Scutigeromorpha (subgroup of Chilopoda)																91												Lithobiomorpha + Scutigeromorpha (subgroup of Chilopoda)**
Endeididae + Ammotheidae (part) (subgroup of Pycnogonida)												77																Endeididae + Ammotheidae (part) (subgroup of Pycnogonida)**
Nymphonidae + Ammotheidae (part) (subgroup of Pycnogonida)																												Nymphonidae + Ammotheidae (part) (subgroup of Pycnogonida)**															78
Acari: Acariformes + Pseudoscorpiones (subgroup of Arachnida)																												Acari: Acariformes + Pseudoscorpiones (subgroup of Arachnida)**															91
Acari (subgroup of Arachnida)																		81										Acari (subgroup of Arachnida)**
Thelyphonida + Amblypygi (subgroup of Arachnida)																												Thelyphonida + Amblypygi (subgroup of Arachnida)**																		75
Pycnogonida + Symphyla																												Pycnogonida + Symphyla**
Nymphonidae + Endeididae																												Nymphonidae + Endeididae**																			82
[truncated: 23 more columns]
